# Supplementary material
Source: Springer Nature journal article supplement (https://www.springermedizin.de/resource/supplementary/12936_2012_2129_MOESM1_ESM.pdf/9542724)
Supplement: MOESM1 [file 9542724]

128 Enrolled patients  
68 children (6-14 y)  
60 adults (15-60 y)

63 assigned to ARPQ  
34 children  
29 adults

65 assigned to ASAQ  
34 children  
31 adults

1 did not complete treatment  
2 non-*P. falciparum*  
monoinfection at admission to  
study determined by PCR  
3 protocol violation  
2 lost to follow-up

2 did not complete treatment  
1 non-*P. falciparum*  
monoinfection at admission to  
study determined by PCR  
1 protocol violation  
2 lost to follow-up

55 (87%; 30 children, 25 adults)  
completed 42 days follow-up or  
had a recurrence of malaria

59 (91%, 31 children, 28 adults)  
completed 42 days follow-up or  
had a recurrence of malaria
